# Supplementary material for: TM6SF2-rs58542926 Genetic Variant Modifies the Protective Effect of a “Prudent” Dietary Pattern on Serum Triglyceride Levels
Source: MDPI journal article supplement (doi:10.3390/nu15051112), 2023-02-23
Supplement: s1 [file s1]

**Table S1. Genetic variants information in the sample**

| SNP        | Gene   | Chr | Strand | Build | Position | Effect Allele | Non Effect Allele | HWE p-value | EAF   |
|------------|--------|-----|--------|-------|----------|---------------|-------------------|-------------|-------|
| rs738409   | PNPLA3 | 22  | +      | 37    | 44324727 | G             | C                 | 0.292       | 0.290 |
| rs58542926 | TM6SF2 | 19  | -      | 37    | 19379549 | A             | G                 | 1           | 0.056 |
| rs780094   | GCKR   | 2   | +      | 37    | 27741237 | A             | G                 | 0.096       | 0.573 |
| rs641738   | MBOAT7 | 19  | +      | 37    | 54173068 | A             | G                 | 0.510       | 0.445 |

SNP: Single nucleotide polymorphism; Chr: Chromosome; HWE p-value: Hardy-Weinberg Equilibrium test p-value; EAF: Effect allele frequency

**Table S2. Genotype distribution in NAFLD patients and controls**

|                         | Controls (N=213) | Cases (N=129) | p-value |
|-------------------------|------------------|---------------|---------|
| PNPLA3 - rs738409 (%)   |                  |               |         |
| CC                      | 54.0             | 48.1          | 0.040   |
| CG                      | 39.4             | 37.2          |         |
| GG                      | 6.6              | 14.7          |         |
| TM6SF2 - rs58542926 (%) |                  |               |         |
| GG                      | 91.5             | 85.3          | 0.073   |
| GA/AA                   | 8.5              | 14.7          |         |
| GCKR - rs780094 (%)     |                  |               |         |
| GG                      | 14.6             | 17.8          | 0.435   |
| GA                      | 56.1             | 49.6          |         |
| AA                      | 29.2             | 32.6          |         |
| MBOAT7 - rs641738 (%)   |                  |               |         |
| GG                      | 32.9             | 31.0          | 0.859   |
| GA                      | 46.9             | 47.3          |         |
| AA                      | 20.2             | 21.7          |         |

p-value: Chi-Square test p-value

**Table S3. Genotype distribution in lean and non-lean (overweight/obese) NAFLD patients**

|                         | <b>Lean NAFLD (N=6)</b> | <b>Non-lean NAFLD (N=123)</b> | <b>p-value</b> |
|-------------------------|-------------------------|-------------------------------|----------------|
| PNPLA3 - rs738409 (%)   |                         |                               |                |
| CC                      | 16.7                    | 49.6                          | 0.218          |
| CG                      | 50.0                    | 36.6                          |                |
| GG                      | 33.3                    | 13.8                          |                |
| TM6SF2 - rs58542926 (%) |                         |                               |                |
| GG                      | 66.7                    | 86.2                          | 0.215          |
| GA/AA                   | 33.3                    | 13.8                          |                |
| GCKR - rs780094 (%)     |                         |                               |                |
| GG                      | 33.3                    | 17.1                          | 0.513          |
| GA                      | 50.0                    | 49.6                          |                |
| AA                      | 16.7                    | 33.3                          |                |
| MBOAT7 - rs641738 (%)   |                         |                               |                |
| GG                      | 16.7                    | 31.7                          | 0.609          |
| GA                      | 66.7                    | 46.3                          |                |
| AA                      | 16.7                    | 22.0                          |                |

p-value: Chi-Square test p-value
